# Supplementary material for: Opportunistic routing with in-network aggregation for duty-cycled WSNs with delay requirements
Source: Springer Nature journal article supplement (doi:10.1186/1687-1499-2014-217), 2014-12-01

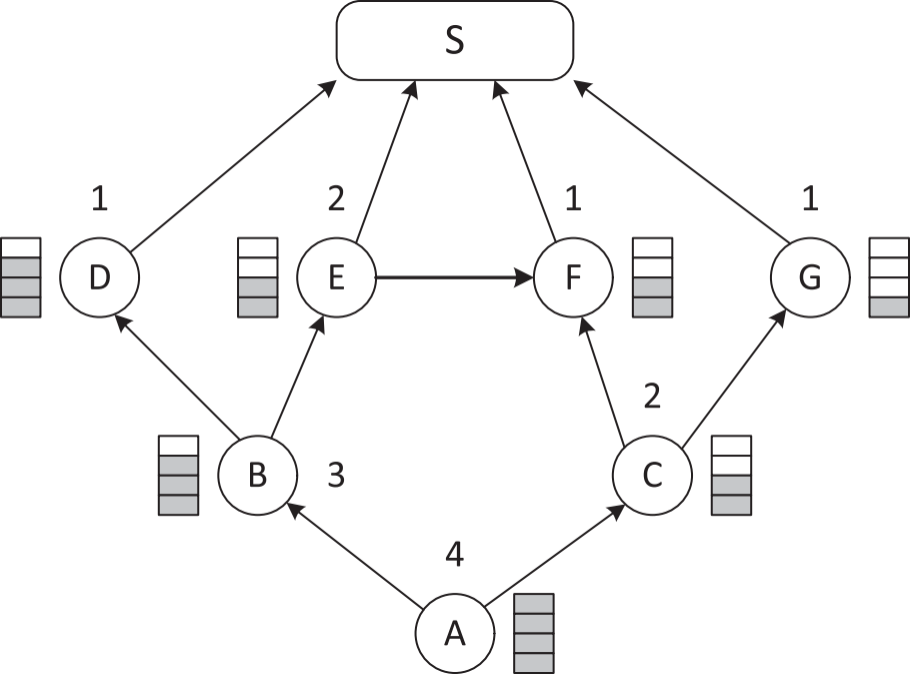

Supplement: 13638_2014_1081_MOESM3_ESM.pdf [file 13638_2014_1081_MOESM3_ESM.pdf]
