# Supplementary material for: Opportunistic routing with in-network aggregation for duty-cycled WSNs with delay requirements
Source: Springer Nature journal article supplement (doi:10.1186/1687-1499-2014-217), 2014-12-01
Supplement: 13638_2014_1081_MOESM7_ESM.pdf [file 13638_2014_1081_MOESM7_ESM.pdf]

Ratio of Late Packets vs. Wakeup Interval

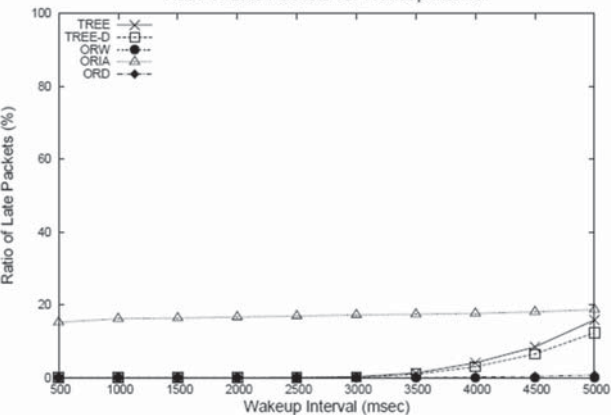(a)  $n=200, s=20$ 

Ratio of Late Packets vs. Wakeup Interval

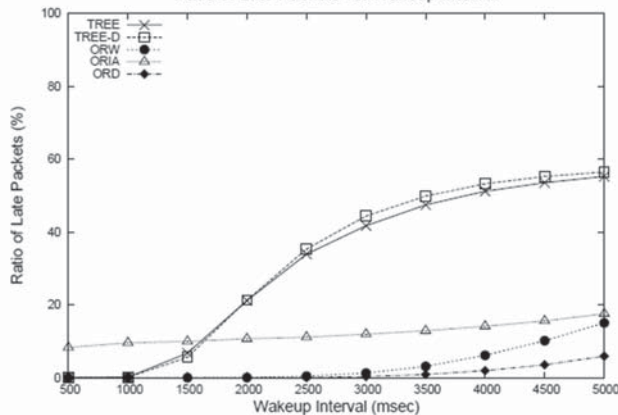(b)  $n=200, s=100$ 

Ratio of Late Packets vs. Wakeup Interval

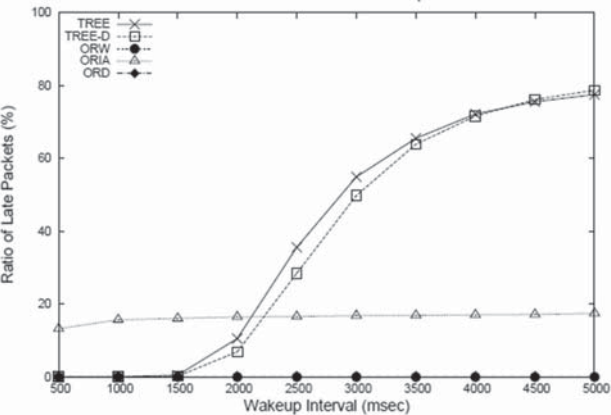(c)  $n=600, s=60$ 

Ratio of Late Packets vs. Wakeup Interval

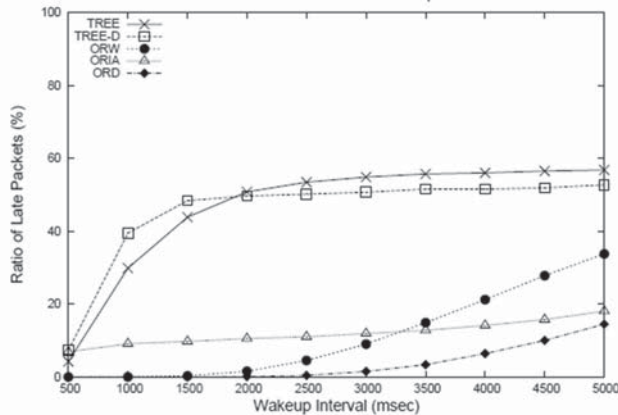(d)  $n=600, s=300$
